# Supplementary material for: Prevalence and Associated Factors of Erosive Tooth Wear among Preschool Children—A Systematic Review and Meta-Analysis
Source: MDPI journal article supplement (doi:10.3390/healthcare10030491), 2022-03-07
Supplement: s1 [file s1]

## Supplementary S1. PRISMA checklist

Table S1. PRISMA checklist

| Section and Topic             | Item# | Checklist Item                                                                                                                                                                                                                                                                                       | Location Where Item Is Reported |
|-------------------------------|-------|------------------------------------------------------------------------------------------------------------------------------------------------------------------------------------------------------------------------------------------------------------------------------------------------------|---------------------------------|
| <b>TITLE</b>                  |       |                                                                                                                                                                                                                                                                                                      |                                 |
| Title                         | 1     | Identify the report as a systematic review.                                                                                                                                                                                                                                                          | pg 1                            |
| <b>ABSTRACT</b>               |       |                                                                                                                                                                                                                                                                                                      |                                 |
| Abstract                      | 2     | See the PRISMA 2020 for Abstracts checklist.                                                                                                                                                                                                                                                         | pg 2                            |
| <b>INTRODUCTION</b>           |       |                                                                                                                                                                                                                                                                                                      |                                 |
| Rationale                     | 3     | Describe the rationale for the review in the context of existing knowledge.                                                                                                                                                                                                                          | pg 3-4                          |
| Objectives                    | 4     | Provide an explicit statement of the objective(s) or question(s) the review addresses.                                                                                                                                                                                                               | pg 4                            |
| <b>METHODS</b>                |       |                                                                                                                                                                                                                                                                                                      |                                 |
| Eligibility criteria          | 5     | Specify the inclusion and exclusion criteria for the review and how studies were grouped for the syntheses.                                                                                                                                                                                          | pg 4-5                          |
| Information sources           | 6     | Specify all databases, registers, websites, organisations, reference lists and other sources searched or consulted to identify studies. Specify the date when each source was last searched or consulted.                                                                                            | pg 5                            |
| Search strategy               | 7     | Present the full search strategies for all databases, registers and websites, including any filters and limits used.                                                                                                                                                                                 | supp file 1                     |
| Selection process             | 8     | Specify the methods used to decide whether a study met the inclusion criteria of the review, including how many reviewers screened each record and each report retrieved, whether they worked independently, and if applicable, details of automation tools used in the process.                     | pg 5-6                          |
| Data collection process       | 9     | Specify the methods used to collect data from reports, including how many reviewers collected data from each report, whether they worked independently, any processes for obtaining or confirming data from study investigators, and if applicable, details of automation tools used in the process. | pg 5-7                          |
| Data items                    | 10a   | List and define all outcomes for which data were sought. Specify whether all results that were compatible with each outcome domain in each study were sought (e.g. for all measures, time points, analyses), and if not, the methods used to decide which results to collect.                        | pg 4                            |
|                               | 10b   | List and define all other variables for which data were sought (e.g. participant and intervention characteristics, funding sources). Describe any assumptions made about any missing or unclear information.                                                                                         | pg 5                            |
| Study risk of bias assessment | 11    | Specify the methods used to assess risk of bias in the included studies, including details of the tool(s) used, how many reviewers assessed each study and whether they worked independently, and if applicable, details of automation tools used in the process.                                    | pg 6                            |
| Effect measures               | 12    | Specify for each outcome the effect measure(s) (e.g. risk ratio, mean difference) used in the synthesis or presentation of results.                                                                                                                                                                  | pg 6                            |
| Synthesis methods             | 13a   | Describe the processes used to decide which studies were eligible for each synthesis (e.g. tabulating the study intervention characteristics and comparing against the planned groups for each synthesis (item #5)).                                                                                 | pg 6                            |
|                               | 13b   | Describe any methods required to prepare the data for presentation or synthesis, such as handling of missing summary statistics, or data conversions.                                                                                                                                                | pg 6                            |
|                               | 13c   | Describe any methods used to tabulate or visually display results of individual studies and syntheses.                                                                                                                                                                                               | pg 6                            |

|                               |     |                                                                                                                                                                                                                                                                                      |                |
|-------------------------------|-----|--------------------------------------------------------------------------------------------------------------------------------------------------------------------------------------------------------------------------------------------------------------------------------------|----------------|
| Reporting bias assessment     | 13d | Describe any methods used to synthesize results and provide a rationale for the choice(s). If meta-analysis was performed, describe the model(s), method(s) to identify the presence and extent of statistical heterogeneity, and software package(s) used.                          | pg 6           |
|                               | 13e | Describe any methods used to explore possible causes of heterogeneity among study results (e.g. subgroup analysis, meta-regression).                                                                                                                                                 | pg 6           |
|                               | 13f | Describe any sensitivity analyses conducted to assess robustness of the synthesized results.                                                                                                                                                                                         | pg 6           |
|                               | 14  | Describe any methods used to assess risk of bias due to missing results in a synthesis (arising from reporting biases).                                                                                                                                                              | pg 6-7         |
| Certainty assessment          | 15  | Describe any methods used to assess certainty (or confidence) in the body of evidence for an outcome.                                                                                                                                                                                | pg 7           |
| <b>RESULTS</b>                |     |                                                                                                                                                                                                                                                                                      |                |
| Study selection               | 16a | Describe the results of the search and selection process, from the number of records identified in the search to the number of studies included in the review, ideally using a flow diagram.                                                                                         | pg 7           |
|                               | 16b | Cite studies that might appear to meet the inclusion criteria, but which were excluded, and explain why they were excluded.                                                                                                                                                          | supp file 2    |
| Study characteristics         | 17  | Cite each included study and present its characteristics.                                                                                                                                                                                                                            | pg 7, Table 1  |
| Risk of bias in studies       | 18  | Present assessments of risk of bias for each included study.                                                                                                                                                                                                                         | pg 8-10        |
| Results of individual studies | 19  | For all outcomes, present, for each study: (a) summary statistics for each group (where appropriate) and (b) an effect estimate and its precision (e.g. confidence/credible interval), ideally using structured tables or plots.                                                     | Table 1        |
| Results of syntheses          | 20a | For each synthesis, briefly summarise the characteristics and risk of bias among contributing studies.                                                                                                                                                                               | pg 7           |
|                               | 20b | Present results of all statistical syntheses conducted. If meta-analysis was done, present for each the summary estimate and its precision (e.g. confidence/credible interval) and measures of statistical heterogeneity. If comparing groups, describe the direction of the effect. | supp file 3    |
|                               | 20c | Present results of all investigations of possible causes of heterogeneity among study results.                                                                                                                                                                                       | pg 10-12       |
|                               | 20d | Present results of all sensitivity analyses conducted to assess the robustness of the synthesized results.                                                                                                                                                                           | pg 10          |
| Reporting biases              | 21  | Present assessments of risk of bias due to missing results (arising from reporting biases) for each synthesis assessed.                                                                                                                                                              | pg 8-10, fig 2 |
| Certainty of evidence         | 22  | Present assessments of certainty (or confidence) in the body of evidence for each outcome assessed.                                                                                                                                                                                  | Table 4        |
| <b>DISCUSSION</b>             |     |                                                                                                                                                                                                                                                                                      |                |
| Discussion                    | 23a | Provide a general interpretation of the results in the context of other evidence.                                                                                                                                                                                                    | pg 16          |
|                               | 23b | Discuss any limitations of the evidence included in the review.                                                                                                                                                                                                                      | pg 18-19       |
|                               | 23c | Discuss any limitations of the review processes used.                                                                                                                                                                                                                                | pg 18-19       |
|                               | 23d | Discuss implications of the results for practice, policy, and future research.                                                                                                                                                                                                       | pg 16-19       |
| <b>OTHER INFORMATION</b>      |     |                                                                                                                                                                                                                                                                                      |                |
| Registration and protocol     | 24a | Provide registration information for the review, including register name and registration number, or state that the review was not registered.                                                                                                                                       | pg 4           |
|                               | 24b | Indicate where the review protocol can be accessed, or state that a protocol was not prepared.                                                                                                                                                                                       | pg 4           |
|                               | 24c | Describe and explain any amendments to information provided at registration or in the protocol.                                                                                                                                                                                      | N/A            |
| Support                       | 25  | Describe sources of financial or non-financial support for the review, and the role of the funders or sponsors in the review.                                                                                                                                                        | pg 19          |

|                                                |    |                                                                                                                                                                                                                                            |       |
|------------------------------------------------|----|--------------------------------------------------------------------------------------------------------------------------------------------------------------------------------------------------------------------------------------------|-------|
| Competing interests                            | 26 | Declare any competing interests of review authors.                                                                                                                                                                                         | pg 19 |
| Availability of data, code and other materials | 27 | Report which of the following are publicly available and where they can be found: template data collection forms; data extracted from included studies; data used for all analyses; analytic code; any other materials used in the review. | pg 19 |

*From:* Page MJ, McKenzie JE, Bossuyt PM, Boutron I, Hoffmann TC, Mulrow CD, et al. The PRISMA 2020 statement: an updated guideline for reporting systematic reviews. *BMJ* 2021;372:n71. doi: 10.1136/bmj.n71. For more information, visit: <http://www.prisma-statement.org/>

## Supplementary S2. Search Strategy

Research title: Prevalence and Associated Risk Factors of Erosive Tooth Wear among Children - A Systematic Review and Meta-Analysis

Medline (via Ovid) Ovid MEDLINE(R) and Epub Ahead of Print, In-Process & Other Non-Indexed Citations, Daily and Versions(R) 1946 to July 13, 2020

Searched on: 15 July 2020

Results: 319

### Medline

---

#### 1. Tooth Erosion/

---

2. (tooth eros\* or dental eros\* or acid erosion or enamel erosion or erosive tooth wear or dental erosive wear).tw.
  3. or/1-2
  4. prevalence/
  5. risk factors/
  6. Risk Assessment/
  7. (prevalence or risk factor\* or risk factors assessment or risk factor function or indicating factors or erosive factors or causative factors).tw.
  8. or/4-7
  9. Child/
  10. Adolescent/
  11. (children\* or child or childhood or teen or teenage\* or pediatric\* or paediatric\* or adolescen\* or boys or girls or youth or youths).tw.
  12. or/9-11
  13. and/3,8,12
- 

Embase

Embase Classic+Embase 1947 to 2020 July 13

Searched on: 15 July 2020

Results: 255

### Embase

---

#### 1. (tooth eros\* or dental eros\* or acid erosion or enamel erosion or erosive tooth wear or dental erosive wear).tw.

---

2. prevalence/
  3. risk factor/
  4. risk assessment/
  5. (prevalence or risk factor\* or risk factors assessment or risk factor function or indicating factors or erosive factors or causative factors).tw.
  6. or/2-5
  7. child/
  8. adolescent/
-

- 
9. (children\* or child or childhood or teen or teenage\* or pediatric\* or paediatric\* or adolescen\* or boys or girls or youth or youths).tw.  
10. or/7-9  
11. and/1,6,10
- 

Web of Science

Searched on: 15 July 2020

Results: 413

((TS=((tooth eros\* or dental eros\* or acid erosion or enamel erosion or erosive tooth wear or dental erosive wear))) AND (TS=((prevalence or risk factor\* or risk factors assessment or risk factor function or indicating factors or erosive factors or causative factors))) AND (TS=((children\* or child or childhood or teen or teenage\* or pediatric\* or paediatric\* or adolescen\* or boys or girls or youth or youths))))

Scopus

Searched on: 15 July 2020

Results: 536

((TITLE-ABS-KEY(tooth eros\*) OR TITLE-ABS-KEY(dental eros\*) OR TITLE-ABS-KEY(acid erosion) OR TITLE-ABS-KEY(enamel erosion) OR TITLE-ABS-KEY(erosive tooth wear) OR TITLE-ABS-KEY(dental erosive wear))) AND ((TITLE-ABS-KEY(prevalence) OR TITLE-ABS-KEY(risk factor\*) OR TITLE-ABS-KEY(risk factors assessment) OR TITLE-ABS-KEY(risk factor function) OR TITLE-ABS-KEY(indicating factors) OR TITLE-ABS-KEY(erosive factors) OR TITLE-ABS-KEY(causative factors))) AND ((TITLE-ABS-KEY(children\*) OR TITLE-ABS-KEY(child) OR TITLE-ABS-KEY(childhood) OR TITLE-ABS-KEY(teen) OR TITLE-ABS-KEY(teenage\*) OR TITLE-ABS-KEY(pediatric\*) OR TITLE-ABS-KEY(paediatric\*) OR TITLE-ABS-KEY(adolescen\*) OR TITLE-ABS-KEY(boys) OR TITLE-ABS-KEY(girls) OR TITLE-ABS-KEY(youth) OR TITLE-ABS-KEY(youths)))

### Supplementary S3. Reasons for exclusion after full-text screening

Table S2. Reasons for exclusion

| Reasons Of Exclusion             | Authors                                                                                                                                                      | Year | Title                                                                                                                                 | Journal                                              |
|----------------------------------|--------------------------------------------------------------------------------------------------------------------------------------------------------------|------|---------------------------------------------------------------------------------------------------------------------------------------|------------------------------------------------------|
| School children (6-12 years old) | Affshana, M. and Gheena                                                                                                                                      | 2015 | Acid erosion of teeth in a pediatric population                                                                                       | Journal of Pharmaceutical Sciences and Research      |
| School children (6-12 years old) | Aidi, H. E., E. M. Bronkhorst, M. C. Huysmans and G. J. Truin                                                                                                | 2011 | Factors associated with the incidence of erosive wear in upper incisors and lower first molars: a multifactorial approach             | Journal of Dentistry                                 |
| No English full text             | Akhmedov, A. B., M. K. Ishanova, M. T. Qodirova, E. Dosmukhamedov and I. Z. Utesheva                                                                         | 2020 | Prevalence, prophylaxis and treatment principles of primary teeth erosion in children                                                 | International Journal of Psychosocial Rehabilitation |
| Adolescents (13-18 years old)    | Al-Dlaigan, Y. H., L. Shaw and A. J. Smith                                                                                                                   | 2002 | Is there a relationship between asthma and dental erosion? A case control study                                                       | International Journal of Paediatric Dentistry        |
| School children (6-12 years old) | Al-Malik, M. I., R. D. Holt and R. Bedi                                                                                                                      | 2002 | Erosion, caries and rampant caries in preschool children in Jeddah, Saudi Arabia                                                      | Community Dentistry & Oral Epidemiology              |
| School children (6-12 years old) | Alvarez Loureiro, L., A. Fabruccini Fager, L. S. Alves, R. Alvarez Vaz and M. Maltz                                                                          | 2015 | Erosive tooth wear among 12-year-old schoolchildren: a population-based cross-sectional study in Montevideo, Uruguay                  | Caries Research                                      |
| School children (6-12 years old) | Alves, L. S., C. D. Brusius, N. Dame-Teixeira, M. Maltz and C. Susin                                                                                         | 2015 | Dental erosion among 12-year-old schoolchildren: a population-based cross-sectional study in South Brazil                             | International Dental Journal                         |
| School children (6-12 years old) | Arnadottir, I. B., W. P. Holbrook, H. Eggertsson, H. Gudmundsdottir, S. H. Jonsson, J. O. Gudlaugsson, S. R. Saemundsson, S. T. Eliasson and H. Agustsdottir | 2010 | Prevalence of dental erosion in children: a national survey                                                                           | Community Dentistry & Oral Epidemiology              |
| Adolescents (13-18 years old)    | Auad, S. M., P. J. Waterhouse, J. H. Nunn and P. J. Moynihan                                                                                                 | 2009 | Dental caries and its association with sociodemographics, erosion, and diet in schoolchildren from southeast Brazil                   | Pediatric Dentistry                                  |
| Tooth wear other than erosion    | Ayers, K. M., B. K. Drummond, W. M. Thomson and J. A. Kieser                                                                                                 | 2002 | Risk indicators for tooth wear in New Zealand school children                                                                         | International Dental Journal                         |
| Adolescents (13-18 years old)    | Bartlett, D. W., P. Y. Coward, C. Nikkah and R. F. Wilson                                                                                                    | 1998 | The prevalence of tooth wear in a cluster sample of adolescent schoolchildren and its relationship with potential explanatory factors | British Dental Journal                               |

|                                  |                                                                                                                  |      |                                                                                                                          |                                                                                                             |
|----------------------------------|------------------------------------------------------------------------------------------------------------------|------|--------------------------------------------------------------------------------------------------------------------------|-------------------------------------------------------------------------------------------------------------|
| No full text in English          | Bax-Adamowicz, A., A. Breborowicz and M. Borysewicz-Lewicka                                                      | 2014 | Oral cavity complaints reported by asthmatic children                                                                    | Alergia Astma Immunologia                                                                                   |
| School children (6-12 years old) | Brusius, C. D., L. S. Alves, C. Susin and M. Maltz                                                               | 2018 | Dental erosion among South Brazilian adolescents: A 2.5-year longitudinal study                                          | Community Dentistry & Oral Epidemiology                                                                     |
| School children (6-12 years old) | Caglar, E., B. Kargul, I. Tanboga and A. Lussi                                                                   | 2005 | Dental erosion among children in an Istanbul public school                                                               | Journal of Dentistry for Children (Chicago, Ill.)                                                           |
| School children (6-12 years old) | Caglar, E., N. Sandalli, N. Panagiotou, K. Tonguc and O. O. Kuscü                                                | 2011 | Prevalence of dental erosion in Greek minority school children in Istanbul                                               | European Archives of Paediatric Dentistry: Official Journal of the European Academy of Paediatric Dentistry |
| Review                           | Chadwick, B. L., D. A. White, A. J. Morris, D. Evans and N. B. Pitts                                             | 2006 | Non-carious tooth conditions in children in the UK, 2003                                                                 | British Dental Journal                                                                                      |
| Adolescents (13-18 years old)    | Chadwick, R. G., H. L. Mitchell, S. L. Manton, S. Ward, S. Ogston and R. Brown                                   | 2005 | Maxillary incisor palatal erosion: no correlation with dietary variables?                                                | Journal of Clinical Pediatric Dentistry                                                                     |
| No full text in English          | Chen, Y. G., X. Li, D. Y. Hu, H. Shen, K. Z. Li, Y. Zhao and L. L. Peng                                          | 2009 | [Prevalence of tooth erosion of 5-year-old and 12-year-old children in Xuzhou city]                                      | Hua Xi Kou Qiang Yi Xue Za Zhi                                                                              |
| School children (6-12 years old) | Cheng, J. and K. Campbell                                                                                        | 2016 | Caries and dental erosion: Are soroti children and adolescents at risk from increased soft-drink availability in Uganda? | African Health Sciences                                                                                     |
| School children (6-12 years old) | Chiriac, A. M., V. Mercut, D. Alexandru, S. M. Popescu, R. Mercut, F. D. Popescu, D. Luchianenco and I. Resceanu | 2019 | Applications of Factorial Analysis in the Study of Risk Factors and their Chemical Influence for Erosive Dental Wear     | Revista De Chimie                                                                                           |
| School children (6-12 years old) | Chiriac, A. M., V. Mercut, A. Dragos, S. M. Popescu, I. Dascalu, H. O. Manolea and I. Resceanu                   | 2018 | EPIDEMIOLOGICAL STUDY OF DENTAL WEAR IN CHILDREN BETWEEN 6 AND 11 YEARS OLD FROM DOLJ COUNTY, ROMANIA                    | Romanian Journal of Oral Rehabilitation                                                                     |
| School children (6-12 years old) | Correr, G. M., R. C. Alonso, M. A. Correa, E. A. Campos, F. Baratto-Filho and R. M. Puppim-Rontani               | 2009 | Influence of diet and salivary characteristics on the prevalence of dental erosion among 12-year-old schoolchildren      | Journal of Dentistry for Children (Chicago, Ill.)                                                           |
| No full text in English          | Cukovic-Bagic, I., J. Dumancic, M. Kujundzic-Tiljak, T. Skrinjaric and H. S. Prpic                               | 2010 | DENTAL EROSION AND ASSOCIATED RISK FACTORS AMONG PRESCHOOL CHILDREN                                                      | Paediatrica Croatica                                                                                        |
| Adolescents (13-18 years old)    | Dahshan, A., H. Patel, J. Delaney, A. Wuerth, R. Thomas and V. Tolia                                             | 2002 | Gastroesophageal reflux disease and dental erosion in children                                                           | Journal of Pediatrics                                                                                       |
| Tooth wear other than erosion    | de Andrade, F. J. P., A. D. Sales-Peres, P. G. de Moura-Grec, M.                                                 | 2016 | Nutritional status, tooth wear and quality of life in Brazilian schoolchildren                                           | Public Health Nutrition                                                                                     |

|                                  |                                                                                                                             |      |                                                                                                                                    |                                                                           |
|----------------------------------|-----------------------------------------------------------------------------------------------------------------------------|------|------------------------------------------------------------------------------------------------------------------------------------|---------------------------------------------------------------------------|
| Adolescents (13-18 years old)    | A. A. Mapengo, A. Sales-Peres and S. H. D. Sales-Peres<br>Deery, C., M. L. Wagner, C. Longbottom, R. Simon and Z. J. Nugent | 2000 | The prevalence of dental erosion in a United States and a United Kingdom sample of adolescents                                     | Pediatric Dentistry                                                       |
| School children (6-12 years old) | Dugmore, C. R. and W. P. Rock                                                                                               | 2003 | The progression of tooth erosion in a cohort of adolescents of mixed ethnicity                                                     | International Journal of Paediatric Dentistry                             |
| School children (6-12 years old) | Dugmore, C. R. and W. P. Rock                                                                                               | 2003 | Asthma and tooth erosion. Is there an association?                                                                                 | International Journal of Paediatric Dentistry                             |
| School children (6-12 years old) | Dugmore, C. R. and W. P. Rock                                                                                               | 2004 | The prevalence of tooth erosion in 12-year-old children                                                                            | British Dental Journal                                                    |
| School children (6-12 years old) | Dugmore, C. R. and W. P. Rock                                                                                               | 2004 | A multifactorial analysis of factors associated with dental erosion                                                                | British Dental Journal                                                    |
| School children (6-12 years old) | Dugmore, C. R. and W. P. Rock                                                                                               | 2005 | The effect of socio-economic status and ethnicity on the comparative oral health of Asian and White Caucasian 12-year-old children | Community Dental Health                                                   |
| School children (6-12 years old) | El Aidi, H., E. M. Bronkhorst, M. C. Huysmans and G. J. Truin                                                               | 2010 | Dynamics of tooth erosion in adolescents: a 3-year longitudinal study                                                              | Journal of Dentistry                                                      |
| School children (6-12 years old) | El Aidi, H., E. M. Bronkhorst, M. C. Huysmans and G. J. Truin                                                               | 2011 | Multifactorial analysis of factors associated with the incidence and progression of erosive tooth wear                             | Caries Research                                                           |
| Adolescents (13-18 years old)    | El Karim, I. A., N. M. Sanhoury, N. T. Hashim and H. M. Ziada                                                               | 2007 | Dental erosion among 12-14 year old school children in Khartoum: a pilot study                                                     | Community Dental Health                                                   |
| Irrelevant                       | Eloot, A., J. Vanobbergen and L. Martens                                                                                    | 2004 | Oral health in asthmatic children: a dose-response study                                                                           | Revue belge de médecine dentaire. Belgisch tijdschrift voor tandheelkunde |
| School children (6-12 years old) | Ersin, N. K., O. Oncag, G. Tumgor, S. Aydogdu and S. Hilmioglu                                                              | 2006 | Oral and dental manifestations of gastroesophageal reflux disease in children: a preliminary study                                 | Pediatric Dentistry                                                       |
| School children (6-12 years old) | Frazao, J. B., L. G. Machado and M. C. Ferreira                                                                             | 2018 | Dental erosion in schoolchildren and associated factors: A cross-sectional study                                                   | Journal of the Indian Society of Pedodontics & Preventive Dentistry       |
| School children (6-12 years old) | Fung, A. and L. B. Messer                                                                                                   | 2013 | Tooth wear and associated risk factors in a sample of Australian primary school children                                           | Australian Dental Journal                                                 |
| Patients with GERD               | Ganesh, M., A. Hertzberg, S. Nurko, H. Needleman and R. Rosen                                                               | 2016 | Acid Rather Than Nonacid Reflux Burden Is a Predictor of Tooth Erosion                                                             | Journal of Pediatric Gastroenterology and Nutrition                       |
| Adolescents (13-18 years old)    | Ganss, C., J. Klimek and K. Giese                                                                                           | 2001 | Dental erosion in children and adolescents--a cross-sectional and longitudinal investigation using study models                    | Community Dentistry & Oral Epidemiology                                   |
| School children (6-12 years old) | Garduno-Picazo, M. G., M. Ruiz-Ramos and M. Juarez-Lopez                                                                    | 2020 | Dental Erosion Risk Factors in 6 to 12 Year Old children in Mexico City                                                            | Journal of Clinical Pediatric Dentistry                                   |
| Tooth wear other than erosion    | Gatou, T. and E. Mamai-Homata                                                                                               | 2012 | Tooth wear in the deciduous dentition of 5-7-year-old children: risk factors                                                       | Clinical Oral Investigations                                              |

|                                  |                                                                                                                          |      |                                                                                                                              |                                                                                                             |
|----------------------------------|--------------------------------------------------------------------------------------------------------------------------|------|------------------------------------------------------------------------------------------------------------------------------|-------------------------------------------------------------------------------------------------------------|
| Adolescents (13-18 years old)    | Gonda-Domin, M., K. Lisiecka, R. Rojek, M. Mokrzycka, J. Szymanowicz and B. Glura                                        | 2013 | Dental manifestations of gastroesophageal reflux disease in children                                                         | Przegląd Gastroenterologiczny                                                                               |
| Adolescents (13-18 years old)    | Gonzalez-Aragon Pineda, A. E., S. A. Borges-Yanez, M. E. Irigoyen-Camacho and A. Lussi                                   | 2019 | Relationship between erosive tooth wear and beverage consumption among a group of schoolchildren in Mexico City              | Clinical Oral Investigations                                                                                |
| Tooth wear other than erosion    | Goswami, U., S. O'Toole and E. Bernabe                                                                                   |      | Asthma, long-term asthma control medication and tooth wear in American adolescents and young adults                          | Journal of Asthma                                                                                           |
| No full text in English          | Gu, Q., J. L. Zhu and D. Y. Tao                                                                                          | 2019 | Epidemiological profiles of dental erosion in 3- to 5-year-old children in Shanghai. [Chinese]                               | Journal of Shanghai Jiaotong University (Medical Science)                                                   |
| School children (6-12 years old) | Gurgel, C. V., D. Rios, M. A. Buzalaf, S. M. da Silva, J. J. Araujo, A. R. Pauletto and M. A. de Andrade Moreira Machado | 2011 | Dental erosion in a group of 12- and 16-year-old Brazilian schoolchildren                                                    | Pediatric Dentistry                                                                                         |
| Adolescents (13-18 years old)    | Gurgel, C. V., D. Rios, T. M. de Oliveira, V. Tassarolli, F. P. Carvalho and M. A. Machado                               | 2011 | Risk factors for dental erosion in a group of 12- and 16-year-old Brazilian schoolchildren                                   | International Journal of Paediatric Dentistry                                                               |
| Adolescents (13-18 years old)    | Hamasha, A. A., F. I. Zawaideh and R. T. Al-Hadithy                                                                      | 2014 | Risk indicators associated with dental erosion among Jordanian school children aged 12-14 years of age                       | International Journal of Paediatric Dentistry                                                               |
| Tooth wear other than erosion    | Harding, M. A., H. P. Whelton, S. C. Shirodaria, D. M. O'Mullane and M. S. Cronin                                        | 2010 | Is tooth wear in the primary dentition predictive of tooth wear in the permanent dentition? Report from a longitudinal study | Community Dental Health                                                                                     |
| Adolescents (13-18 years old)    | Harlukowicz, K. and U. Kaczmarek                                                                                         | 2017 | Prevalence and determinants of extrinsic origin dental erosion among children and adolescents from Wrocław                   | Dental and Medical Problems                                                                                 |
| School children (6-12 years old) | Holbrook, W. P., I. B. Arnadottir, S. O. Hlooversson, E. Arnarsdottir, S. H. Jonsson and S. R. Saemundsson               | 2014 | The Basic Erosive Wear Examination (BEWE) applied retrospectively to two studies                                             | Clinical Oral Investigations                                                                                |
| No full text in English          | Hou, X. M., Q. Zhang, X. C. Chen and J. D. Wang                                                                          | 2009 | [Prevalence of dental erosion and associated drinks in 12-year-old population of Beijing]                                    | Chung-Hua Kou Chiang i Hsueh Tsa Chih Chinese Journal of Stomatology                                        |
| No full text in English          | Huartamendia, R., A. Nappa and R. Queirolo                                                                               | 2012 | Oral health problems related to the use of inhalational drugs in respiratory disorders                                       | Odontoestomatologia                                                                                         |
| School children (6-12 years old) | Huew, R., P. Waterhouse, P. Moynihan, S. Kometa and A. Maguire                                                           | 2012 | Dental caries and its association with diet and dental erosion in Libyan schoolchildren                                      | International Journal of Paediatric Dentistry                                                               |
| School children (6-12 years old) | Huew, R., P. J. Waterhouse, P. J. Moynihan, S. Kometa and A. Maguire                                                     | 2011 | Dental erosion and its association with diet in Libyan schoolchildren                                                        | European Archives of Paediatric Dentistry: Official Journal of the European Academy of Paediatric Dentistry |
| School children (6-12 years old) | Huew, R., P. J. Waterhouse, P. J. Moynihan and A. Maguire                                                                | 2012 | Dental erosion among 12 year-old Libyan schoolchildren                                                                       | Community Dental Health                                                                                     |

|                                  |                                                                                                             |      |                                                                                                                        |                                                                                       |
|----------------------------------|-------------------------------------------------------------------------------------------------------------|------|------------------------------------------------------------------------------------------------------------------------|---------------------------------------------------------------------------------------|
| No full text in English          | Jaeggi, T. and A. Lussi                                                                                     | 2004 | [Erosion in early school-age children]                                                                                 | Schweizer Monatsschrift fur Zahnmedizin                                               |
| Adolescents (13-18 years old)    | Jastaniyah, N., I. Al-Majed and A. Alqahtani                                                                | 2019 | The relationship between overweight/obesity and dental erosion among a group of Saudi children and adolescents         | Indian Journal of Dental Research                                                     |
| Conference paper                 | Javadzadeh, F. and M. Rafeey                                                                                | 2012 | Dental erosion and gastroesophageal reflux disease (GERD) in children                                                  | Archives of Disease in Childhood                                                      |
| Adolescents (13-18 years old)    | Kazoullis, S., W. K. Seow, T. Holcombe, B. Newman and D. Ford                                               | 2007 | Common dental conditions associated with dental erosion in schoolchildren in Australia                                 | Pediatric Dentistry                                                                   |
| School children (6-12 years old) | Kirthiga, M., P. Poornima, R. Praveen, B. Sakeena and P. Disha                                              | 2015 | Dental Erosion and its Associated Factors In 11-16-Year Old School Children                                            | Journal of Clinical Pediatric Dentistry                                               |
| No English full text             | Kosmowska, A.                                                                                               | 2008 | Clinical symptoms of pathological gastroesophageal reflux in infants and children under 6 years of age. [Polish]       | Polski merkuriusz lekarski : organ Polskiego Towarzystwa Lekarskiego                  |
| Adolescents (13-18 years old)    | Kumar, S., S. Acharya, P. Mishra, N. Debnath and R. Vasthare                                                | 2013 | Prevalence and risk factors for dental erosion among 11- to 14-year-old school children in South India                 | Journal of Oral Science                                                               |
| School children (6-12 years old) | Kunzel, W., M. S. Cruz and T. Fischer                                                                       | 2000 | Dental erosion in Cuban children associated with excessive consumption of oranges                                      | European Journal of Oral Sciences                                                     |
| Adolescents (13-18 years old)    | Larsen, M. J., S. Poulsen and I. Hansen                                                                     | 2005 | Erosion of the teeth: prevalence and distribution in a group of Danish school children                                 | European Journal of Paediatric Dentistry                                              |
| School children (6-12 years old) | Li, J., W. Fan, Y. Lu, D. Xuan, Z. Liu, S. Huang and J. Zhang                                               | 2019 | A survey on the prevalence and risk indicators of erosive tooth wear among adolescents in Guangzhou, South China       | Journal of Oral Rehabilitation                                                        |
| Adolescents (13-18 years old)    | Linnett, V., W. K. Seow, F. Connor and R. Shepherd                                                          | 2002 | Oral health of children with gastro-esophageal reflux disease: a controlled study                                      | Australian Dental Journal                                                             |
| Adolescents (13-18 years old)    | Luciano, L. C. O., M. C. Ferreira and M. A. Paschoal                                                        | 2017 | Prevalence and factors associated with dental erosion in individuals aged 12-30 years in a northeastern Brazilian city | Clinical Cosmetic and Investigational Dentistry                                       |
| Adolescents (13-18 years old)    | Mafla, A. C., X. A. Ceron-Bastidas, M. E. Munoz-Ceballos, D. C. Vallejo-Bravo and M. C. Fajardo-Santacruz   | 2017 | Prevalence and Extrinsic Risk Factors for Dental Erosion in Adolescents                                                | Journal of Clinical Pediatric Dentistry                                               |
| School children (6-12 years old) | Maharani, D. A., S. Zhang, S. S. Gao, C. H. Chu and A. Rahardjo                                             | 2019 | Dental Caries and the Erosive Tooth Wear Status of 12-Year-Old Children in Jakarta, Indonesia                          | International Journal of Environmental Research & Public Health [Electronic Resource] |
| School children (6-12 years old) | Mangueira, D. F., F. C. Sampaio and A. F. Oliveira                                                          | 2009 | Association between socioeconomic factors and dental erosion in Brazilian schoolchildren                               | Journal of Public Health Dentistry                                                    |
| Adolescents (13-18 years old)    | Marques Martinez, L., A. M. Leyda Menendez, M. Ribelles Llop, C. Segarra Ortells, R. Aiuto and D. Garcovich | 2019 | Dental erosion. Etiologic factors in a sample of Valencian children and adolescents. Cross-sectional study             | European Journal of Paediatric Dentistry                                              |

|                                  |                                                                                                          |      |                                                                                                                                                        |                                                                                                             |
|----------------------------------|----------------------------------------------------------------------------------------------------------|------|--------------------------------------------------------------------------------------------------------------------------------------------------------|-------------------------------------------------------------------------------------------------------------|
| School children (6-12 years old) | Massignan, C., J. Moro, B. Moccelini, F. M. T. de Vasconcelos, M. Cardoso and M. Bolan                   | 2019 | Socio-economic characteristics, acid drinking patterns and gastric alterations associated with erosive tooth wear in children: a cross-sectional study | European Archives of Paediatric Dentistry: Official Journal of the European Academy of Paediatric Dentistry |
| Adolescents (13-18 years old)    | McGuire, J., A. Szabo, S. Jackson, T. G. Bradley and C. Okunseri                                         | 2009 | Erosive tooth wear among children in the United States: relationship to race/ethnicity and obesity                                                     | International Journal of Paediatric Dentistry                                                               |
| Duplication                      | Millward, A., L. Shaw and A. Smith                                                                       | 1994 | DENTAL EROSION IN 4-YEAR-OLD CHILDREN FROM DIFFERING SOCIOECONOMIC BACKGROUNDS                                                                         | Journal of Dentistry for Children                                                                           |
| Adolescents (13-18 years old)    | Monagas, J., P. Ritwik, A. Kolomensky, J. Acosta, D. Kay, L. Clendaniel and P. E. Hyman                  | 2017 | Rumination Syndrome and Dental Erosions in Children                                                                                                    | Journal of Pediatric Gastroenterology & Nutrition                                                           |
| Adolescents (13-18 years old)    | Mungia, R., L. A. Zarzabal, S. C. Dang, M. Baez, G. K. Stookey and J. P. Brown                           | 2009 | Epidemiologic survey of erosive tooth wear in San Antonio, Texas                                                                                       | Texas Dental Journal                                                                                        |
| Adolescents (13-18 years old)    | Nahas Pires Correa, M. S., F. Nahas Pires Correa, J. P. Nahas Pires Correa, C. Murakami and F. M. Mendes | 2011 | Prevalence and associated factors of dental erosion in children and adolescents of a private dental practice                                           | International Journal of Paediatric Dentistry                                                               |
| School children (6-12 years old) | Nayak, S. S., B. R. Ashokkumar, A. V. Ankola and M. Hebbal                                               | 2009 | Dental erosion among 12 year old school children in belgaum city- a cross sectional study                                                              | Pakistan Paediatric Journal                                                                                 |
| School children (6-12 years old) | Nihtyanova, T., M. Kukleva, T. Miteva-Katrandzhieva, S. Petrova and A. Belcheva-Krivorova                | 2018 | Study of the relationship between oral-hygiene habits and the presence of dental erosion in preschool and school children                              | Journal of IMAB - Annual Proceeding (Scientific Papers)                                                     |
| Adolescents (13-18 years old)    | Ogunyinka, A., O. O. Dosumu and O. D. Otuyemi                                                            | 2001 | The pattern of toothwear amongst 12-18-year-old students in a Nigerian population                                                                      | Journal of Oral Rehabilitation                                                                              |
| Adolescents (13-18 years old)    | Okunseri, C., E. Okunseri, C. Gonzalez, A. Visotcky and A. Szabo                                         | 2011 | Erosive tooth wear and consumption of beverages among children in the United States                                                                    | Caries Research                                                                                             |
| Adolescents (13-18 years old)    | O'Sullivan, E. A. and M. E. Curzon                                                                       | 2000 | Salivary factors affecting dental erosion in children                                                                                                  | Caries Research                                                                                             |
| Adolescents (13-18 years old)    | O'Sullivan, E. A., M. E. Curzon, G. J. Roberts, P. J. Milla and M. D. Stringer                           | 1998 | Gastroesophageal reflux in children and its relationship to erosion of primary and permanent teeth                                                     | European Journal of Oral Sciences                                                                           |
| Adolescents (13-18 years old)    | O'Sullivan, E. A. and M. E. J. Curzon                                                                    | 2000 | A comparison of acidic dietary factors in children with and without dental erosion                                                                     | Journal of Dentistry for Children                                                                           |
| Adolescents (13-18 years old)    | Padmaharish, V. and R. Abilasha                                                                          | 2015 | Prevalence of tooth wear in children and adolescents - A survey based research                                                                         | Journal of Pharmaceutical Sciences and Research                                                             |
| School children (6-12 years old) | Peker, S., B. Kargul, I. Tanboga, T. Tunali-Akbay, A. Yarat, F. Karakoc, R. Ersu and E. Dagli            | 2015 | Oral health and related factors in a group of children with cystic fibrosis in Istanbul, Turkey                                                        | Nigerian Journal of Clinical Practice                                                                       |

|                                  |                                                                                                                                  |      |                                                                                                                                             |                                                                                                                                       |
|----------------------------------|----------------------------------------------------------------------------------------------------------------------------------|------|---------------------------------------------------------------------------------------------------------------------------------------------|---------------------------------------------------------------------------------------------------------------------------------------|
| School children (6-12 years old) | Peres, K. G., M. F. Armenio, M. A. Peres, J. Traebert and J. T. De Lacerda                                                       | 2005 | Dental erosion in 12-year-old schoolchildren: a cross-sectional study in Southern Brazil                                                    | International Journal of Paediatric Dentistry                                                                                         |
| Tooth wear other than erosion    | Pineda-Higuita, S., V. Saldarriaga-Bolivar, C. Gonzalez-Penagos, S. Moreno-Callejas and A. Y. Murillo-Murillo                    | 2019 | Characteristics and severity of tooth wear in 2 to 5-year-old kindergarten children in Medellin                                             | Acta Odontologica Latinoamericana                                                                                                     |
| School children (6-12 years old) | Provatenou, E., E. G. Kaklamanos, A. Kevrekidou, I. Kosma and N. Kotsanos                                                        | 2016 | Erosive Tooth Wear and Related Risk Factors in 8- and 14-Year-Old Greek Children                                                            | Caries Research                                                                                                                       |
| School children (6-12 years old) | Rezende, G., N. M. L. Dos Santos, C. Stein, J. B. Hilgert and D. D. Faustino-Silva                                               | 2019 | Asthma and oral changes in children: Associated factors in a community of southern Brazil                                                   | International Journal of Paediatric Dentistry                                                                                         |
| No full text in English          | Rihter, I. D., G. Jovanov, B. Petrovic, D. Blagojevic, D. Petrovic, D. Markovic and J. Dmitrovic                                 | 2015 | The Presence of Non-Carious Lesions in Children                                                                                             | Srpski Arhiv Za Celokupno Lekarstvo                                                                                                   |
| Tooth wear other than erosion    | Rios, D., A. C. Magalhaes, H. M. Honorio, M. A. Buzalaf, J. R. Lauris and M. A. Machado                                          | 2007 | The prevalence of deciduous tooth wear in six-year-old children and its relationship with potential explanatory factors                     | Oral Health & Preventive Dentistry                                                                                                    |
| Conference paper                 | Romano, C. and S. Cardile                                                                                                        | 2014 | Gastroesophageal reflux disease and oral manifestations                                                                                     | Italian Journal of Pediatrics. Conference: 70th Congress of the Italian Society of Pediatrics. Palermo Italy. Conference Publication: |
| School children (6-12 years old) | Salas, M. M. S., F. Vargas-Ferreira, T. M. Ardenghi, K. G. Peres, M. D. Huysmans and F. F. Demarco                               | 2017 | Prevalence and Associated Factors of Tooth Erosion in 8 -12-Year-Old Brazilian Schoolchildren                                               | Journal of Clinical Pediatric Dentistry                                                                                               |
| School children (6-12 years old) | Salas, M. M. S., F. Vargas-Ferreira, G. G. Nascimento, M. C. Huysmanns and F. F. Demarco                                         | 2018 | Tooth Erosion Association with Obesity: Findings from Pesquisa Brasileira Em Odontopediatria E Clinica a Brazilian Survey in Schoolchildren | Integrada                                                                                                                             |
| School children (6-12 years old) | Salasa, M. M. S., R. V. F. Dantasa, H. R. Sarmiento, F. Vargas-Ferreira, D. Torriani and F. F. Demarco                           | 2014 | Tooth erosion and dental caries in schoolchildren: Is there a relationship between them?                                                    | Brazilian Journal of Oral Sciences                                                                                                    |
| Tooth wear other than erosion    | Sales-Peres, S. H. C., A. C. Sales-Peres, J. A. Marsicano, C. A. P. Carvalho, F. S. Carvalho, J. R. P. Lauris and A. Sales-Peres | 2011 | The relationship between tooth wear in the primary and permanent dentitions                                                                 | Community Dental Health                                                                                                               |

|                                  |                                                                                                       |      |                                                                                                                                                         |                                                                     |
|----------------------------------|-------------------------------------------------------------------------------------------------------|------|---------------------------------------------------------------------------------------------------------------------------------------------------------|---------------------------------------------------------------------|
| School children (6-12 years old) | Sales-Peres, S. H. D., S. Goya, J. J. de Araujo, A. Sales-Peres, J. R. P. Lauris and M. A. R. Buzalaf | 2008 | Prevalence of dental wear among 12-year-old Brazilian adolescents using a modification of the tooth wear index                                          | Public Health                                                       |
| Adolescents (13-18 years old)    | Sanhoury, N. M., H. M. Ziada, G. I. Ahmed and A. H. Kamis                                             | 2010 | Tooth surface loss, prevalence and associated risk factors among 12-14 years school children in Khartoum State, Sudan                                   | Community Dental Health                                             |
| School children (6-12 years old) | Sarath Kumar, K. S., J. Mungara, N. R. Venumbaka, P. Vijayakumar and D. Karunakaran                   | 2018 | Oral manifestations of gastroesophageal reflux disease in children: A preliminary observational study                                                   | Journal of the Indian Society of Pedodontics & Preventive Dentistry |
| School children (6-12 years old) | Septalita, A., A. Bahar, A. Agustanti, A. Rahardjo, D. A. Maharani, R. Rosalien and Iop               | 2017 | Dental erosion in 12-year-old school children living in Jakarta                                                                                         | 1st Physics and Technologies in Medicine and Dentistry Symposium    |
| No English full text             | Seraoui, H.                                                                                           | 2012 | Nutrition and teeth erosion                                                                                                                             | Fundamental and Clinical Pharmacology                               |
| Adolescents (13-18 years old)    | Shahbaz, U., F. Quadir and T. Hosein                                                                  | 2016 | Determination of Prevalence of Dental Erosion in 12 - 14 Years School Children and Its Relationship with Dietary Habits                                 | JcpSP, Journal of the College of Physicians & Surgeons - Pakistan   |
| Adolescents (13-18 years old)    | Shaw, L., Y. H. al-Dlaigan and A. Smith                                                               | 2000 | Childhood asthma and dental erosion                                                                                                                     | Journal of Dentistry for Children                                   |
| School children (6-12 years old) | Shitsuka, C., M. Correa, D. A. Duarte and M. F. Leite                                                 | 2015 | Quantification of Dental Biofilm in Children with Dental Erosion                                                                                        | Pesquisa Brasileira Em Odontopediatria E Clinica Integrada          |
| No English full text             | Silveira, E. G., M. Farias and D. R. Tames                                                            | 2003 | Prevalence of dental erosion in children from municipal schools in the City of Itajai (SC-Brazil)                                                       | Journal of Dental Research                                          |
| Patients with special needs      | Taji, S. S., W. K. Seow, G. C. Townsend and T. Holcombe                                               | 2010 | A controlled study of dental erosion in 2- to 4-year-old twins                                                                                          | International Journal of Paediatric Dentistry                       |
| No full text in English          | Truin, G. J., J. E. Frencken, J. Mulder, A. J. Kootwijk and E. Jong                                   | 2007 | Prevalence of caries and dental erosion among school children in The Hague from 1996-2005. [Dutch]                                                      | Nederlands tijdschrift voor tandheelkunde                           |
| No full text in English          | Truin, G. J., H. M. van Rijkom, J. Mulder and M. A. van 't Hof                                        | 2004 | [Dental caries and dental erosion among 5- and 6-year old and 11- and 12-year old school children in the Hague, the Netherlands. Changing prevalences?] | Nederlands Tijdschrift voor Tandheelkunde                           |
| School children (6-12 years old) | Truin, G. J., H. M. van Rijkom, J. Mulder and M. A. van't Hof                                         | 2005 | Caries trends 1996-2002 among 6- and 12-year-old children and erosive wear prevalence among 12-year-old children in The Hague                           | Caries Research                                                     |
| Adolescents (13-18 years old)    | Tschammler, C., A. Simon, K. Brockmann, M. Robl and A. Wiegand                                        | 2019 | Erosive tooth wear and caries experience in children and adolescents with obesity                                                                       | Journal of Dentistry                                                |
| School children (6-12 years old) | Vargas-Ferreira, F., J. R. Praetzel and T. M. Ardenghi                                                | 2011 | Prevalence of tooth erosion and associated factors in 11-14-year-old Brazilian schoolchildren                                                           | Journal of Public Health Dentistry                                  |

|                                  |                                                                                                                  |      |                                                                                                                       |                                           |
|----------------------------------|------------------------------------------------------------------------------------------------------------------|------|-----------------------------------------------------------------------------------------------------------------------|-------------------------------------------|
| Adolescents (13-18 years old)    | Wang, P., H. C. Lin, J. H. Chen and H. Y. Liang                                                                  | 2010 | The prevalence of dental erosion and associated risk factors in 12-13-year-old school children in Southern China      | BMC Public Health                         |
| Adolescents (13-18 years old)    | Wang, P., Y. Zhou, Y. H. Zhu and H. C. Lin                                                                       | 2011 | Unstimulated and stimulated salivary characteristics of 12-13-year-old schoolchildren with and without dental erosion | Archives of Oral Biology                  |
| School children (6-12 years old) | Wiegand, A., J. Muller, C. Werner and T. Attin                                                                   | 2006 | Prevalence of erosive tooth wear and associated risk factors in 2-7-year-old German kindergarten children             | Oral Diseases                             |
| Adolescents (13-18 years old)    | Wild, Y. K., M. B. Heyman, E. Vittinghoff, D. H. Dalal, J. M. Wojcicki, A. L. Clark, B. Rechmann and P. Rechmann | 2011 | Gastroesophageal reflux is not associated with dental erosion in children                                             | Gastroenterology                          |
| Adolescents (13-18 years old)    | Ximenes, R., G. Couto and E. Sougey                                                                              | 2010 | Eating disorders in adolescents and their repercussions in oral health                                                | International Journal of Eating Disorders |
| Adolescents (13-18 years old)    | Yaseen, S. M., R. A. Togo, Z. Meer, A. M. Al-Dheer, M. A. Al-Futaih, A. A. Al-Jalal and N. S. Al-Qahtani         | 2013 | Dental erosion among 12-15-year-old school boys in southern Saudi Arabia                                              | Archives of Orofacial Science             |
| School children (6-12 years old) | Zhang, J., Y. Du, Z. Wei, B. Tai, H. Jiang and M. Du                                                             | 2015 | The prevalence and risk indicators of tooth wear in 12- and 15-year-old adolescents in Central China                  | BMC Oral Health                           |
| School children (6-12 years old) | Zhang, S., A. M. Chau, E. C. Lo and C. H. Chu                                                                    | 2014 | Dental caries and erosion status of 12-year-old Hong Kong children                                                    | BMC Public Health                         |

## Supplemenatary S4. Measurement index of dental erosion

### Indices of dental erosion.

| Index                                    | Citation                  | References                                                                                                                                                                                                                                                              |
|------------------------------------------|---------------------------|-------------------------------------------------------------------------------------------------------------------------------------------------------------------------------------------------------------------------------------------------------------------------|
| Tooth wear index (TWI)                   | Smith and Knight (1984)   | Smith, B.G.; Knight, J. K. An index for measuring the wear of teeth. <i>Br Dent J</i> <b>1984</b> , 156, 435-438.                                                                                                                                                       |
| Tooth wear index modified (TWI-modified) | Bardsley et al.           | Bardsley, P.F., Taylor, S., Milosevic, A. Epidemiological studies of tooth wear and dental erosion in 14-year-old children in North West England. Part 1: The relationship with water fluoridation and social deprivation. <i>Br Dent J</i> <b>2004</b> , 197, 413-416. |
| Erosion Partial Recording System (EPRS)  | Hasselkvist et al. (2010) | Hasselkvist, A., Johansson, A., Johansson, A.K. Dental erosion and soft drink consumption in Swedish children and adolescents and the development of a simplified erosion partial recording system. <i>Swed Dent J</i> <b>2010</b> , 34, 187-195.                       |
| O'Sullivan index                         | O'Sullivan (2000)         | O'Sullivan, E.A. A new index for the measurement of erosion in children. <i>Eur J Paediatr Dent</i> <b>2000</b> , 1, 69-74.                                                                                                                                             |
| Basic Erosive Wear Examination (BEWE)    | Bartlett et al. (2008)    | Bartlett, D., Ganss, C., Lussi, A. Basic Erosive Wear Examination (BEWE): a new scoring system for scientific and clinical needs. <i>Clin Oral Investig</i> <b>2008</b> , 12, S65-68.                                                                                   |

### Tooth wear index (TWI)

| Score | Description                                                                                                                     | Teeth Evaluated     | Surfaces Evaluated                                                                                       |
|-------|---------------------------------------------------------------------------------------------------------------------------------|---------------------|----------------------------------------------------------------------------------------------------------|
| 0     | Enamel: Surface characteristics intact<br>Dentine: intact                                                                       | The whole dentition | Occlusal/incisal surfaces<br>Buccal surfaces<br>Lingual surfaces<br>Cervical surfaces<br>Whole dentition |
| 1     | Enamel: Surface characteristics lost<br>Minimal loss of contour<br>Dentine: intact                                              |                     |                                                                                                          |
| 2     | Enamel: Lost<br>Dentine: <1/3 of exposed dentine just exposing dentine<br>Defect <1mm                                           |                     |                                                                                                          |
| 3     | Enamel: Lost<br>Dentine: <2/3 of exposed dentine<br>Substantial loss of dentine<br>Defect <1-2mm                                |                     |                                                                                                          |
| 4     | Enamel: Complete lost<br>Dentine:<br>Secondary dentin exposure with or without pulp exposure<br>Defect ≥2mm deep- pulp exposure |                     |                                                                                                          |

### TWI-modified index

| Score | Description                          | Teeth Evaluated | Surfaces Evaluated        |
|-------|--------------------------------------|-----------------|---------------------------|
| 0     | Enamel: Surface characteristics lost |                 | Occlusal/incisal surfaces |

|                         |                                                                                                        |                                                             |
|-------------------------|--------------------------------------------------------------------------------------------------------|-------------------------------------------------------------|
| Minimal loss of contour |                                                                                                        | Buccal surfaces<br>Lingual surfaces<br>Cervical surfaces    |
| Dentine: intact         |                                                                                                        |                                                             |
| Enamel: Lost            |                                                                                                        |                                                             |
| 1                       | Dentine: <1/3 of exposed dentine<br>just exposing dentine                                              | 4 first permanent<br>molars<br>Six upper and lower<br>teeth |
| Enamel: Lost            |                                                                                                        |                                                             |
| 2                       | Dentine: <2/3 of exposed dentine<br>Substantial loss of dentine                                        |                                                             |
| Enamel: Complete lost   |                                                                                                        |                                                             |
| 3                       | Dentine:<br>Secondary dentin exposure with or without pulp exposure<br>Defect ≥2mm deep- pulp exposure |                                                             |
|                         |                                                                                                        |                                                             |

#### Erosion Partial Recording System (EPRS)

| Score               | Description                                                                                                                                              | Teeth Evaluated                   | Surfaces Evaluated                                                                    |
|---------------------|----------------------------------------------------------------------------------------------------------------------------------------------------------|-----------------------------------|---------------------------------------------------------------------------------------|
| 0= No erosion       | No visible change<br>Developmental structures intact<br>Surface features intact                                                                          | Upper and lower<br>anterior teeth | Occlusal/incisal surfaces<br>Buccal surfaces<br>Lingual surfaces<br>Cervical surfaces |
| 1= Mild erosion     | Smoothened enamel<br>Partial or complete loss of developing structure<br>Matt, shiny, rounded or flat enamel surface, but most surface features remained | Upper and lower<br>molars         |                                                                                       |
| 2= Moderate erosion | Description in Score 1<br>Changes in surface features<br>Facet or concavities within enamel<br>No dentine exposure<br>Cupping >1mm                       |                                   |                                                                                       |

|                        |                                                                                                                            |  |  |
|------------------------|----------------------------------------------------------------------------------------------------------------------------|--|--|
| 3=Severe erosion       | Description in Score 1-2. Surface features significantly changed.<br>Dentine exposure $\leq 1/3$<br>Cupping $> 1\text{mm}$ |  |  |
| 4= Very severe erosion | Dentine surface exposure $> 1/3$ or pulp exposure<br>Fused cupping                                                         |  |  |

#### O'Sullivan Index

| Score | Description                                           | Teeth Evaluated | Surfaces Evaluated                                                                    |
|-------|-------------------------------------------------------|-----------------|---------------------------------------------------------------------------------------|
| 0     | Normal                                                | Whole dentition | Occlusal/incisal surfaces<br>Buccal surfaces<br>Lingual surfaces<br>Cervical surfaces |
| 1     | Matt enamel surface or lack of clarity when dried     |                 |                                                                                       |
| 2     | Matt enamel surface or lack of clarity without drying |                 |                                                                                       |
| 3     | Morphological changes localized to enamel             |                 |                                                                                       |
| 4     | Primary dentine exposure                              |                 |                                                                                       |
| 5     | Reparative dentine exposure                           |                 |                                                                                       |
| 6     | Pulpal exposure                                       |                 |                                                                                       |

#### BEWE

| Score | Description                                                                                                     | Teeth Evaluated                                         | Surfaces Evaluated                                                                    |
|-------|-----------------------------------------------------------------------------------------------------------------|---------------------------------------------------------|---------------------------------------------------------------------------------------|
| 0     | No erosive tooth wear                                                                                           | Highest score<br>recorded for each of<br>the 6 sextants | Occlusal/incisal surfaces<br>Buccal surfaces<br>Lingual surfaces<br>Cervical surfaces |
| 1     | Initial loss of enamel                                                                                          |                                                         |                                                                                       |
| 2     | Distinctive defects<br>< 50% tooth structure loss<br>Involved < 50% surface area<br>Dentine is usually involved |                                                         |                                                                                       |
| 3     | Distinctive defects<br>$\geq 50\%$ tooth structure loss<br>Dentine is usually involved                          |                                                         |                                                                                       |

|  |  |  |  |
|--|--|--|--|
|  |  |  |  |
|--|--|--|--|

# Supplemenatary S5. Meta-analyses.

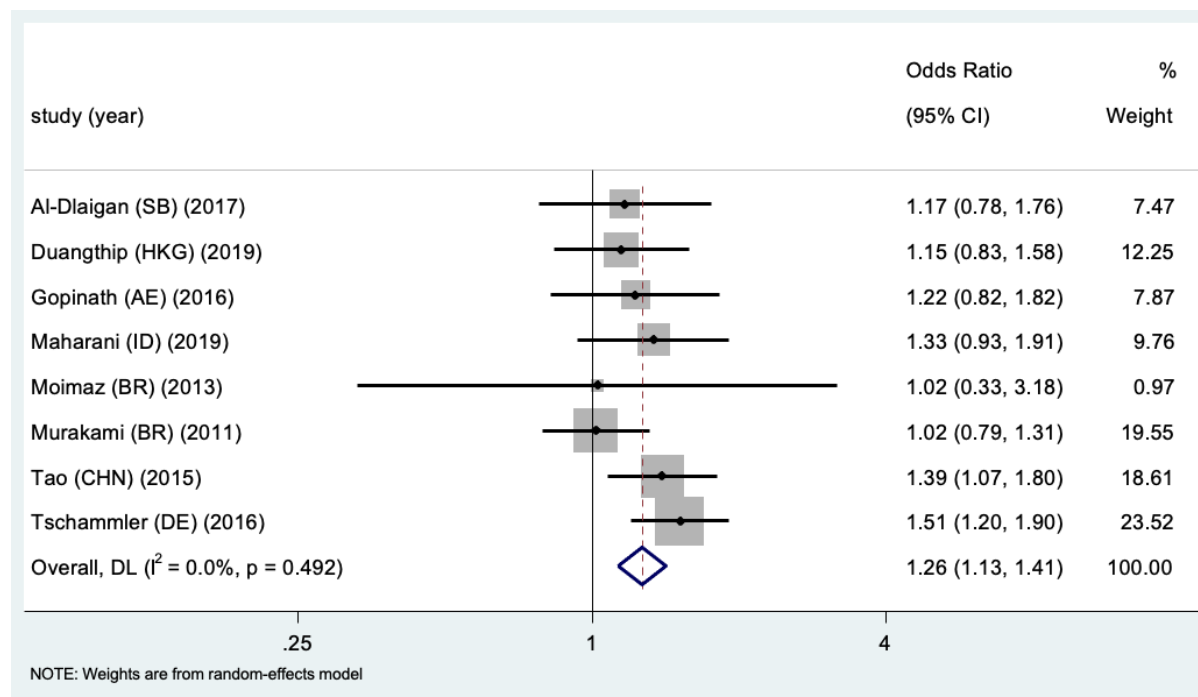

95% CI: 95% Confidence Interval; I<sup>2</sup>: I-square statistics; p: p-value

**Figure S1.** Forest plot showing likelihood of erosive tooth wear in boys vs girls.

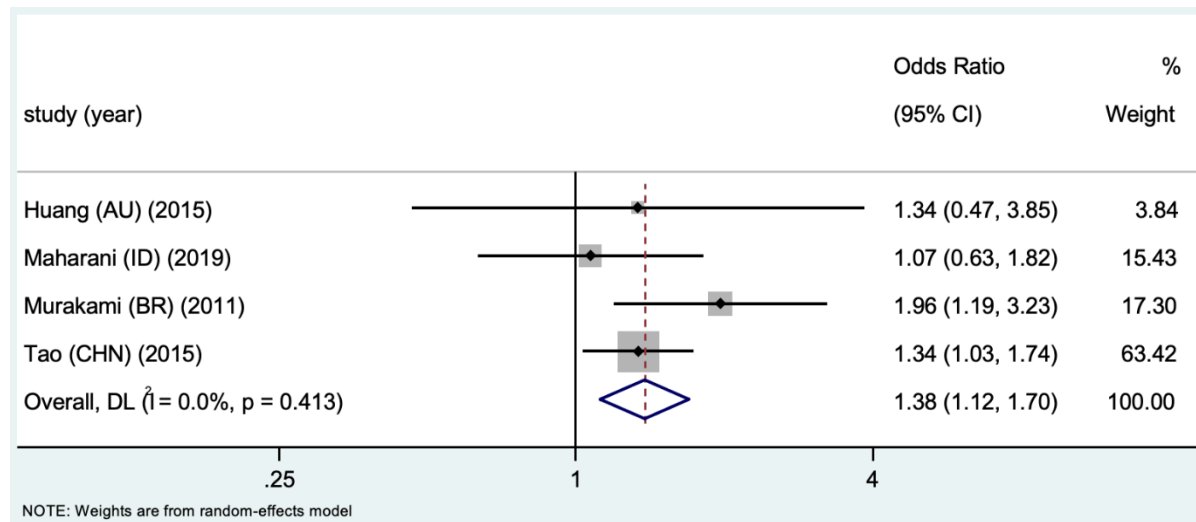

95% CI: 95% Confidence Interval;  $I^2$ : I-squared statistics;  $p$ : p-value

**Figure S2.** Forest plot showing likelihood of erosive tooth wear in patients with GERD, frequent vomiting, and/or digestive disorders vs patients without such digestive disorders.

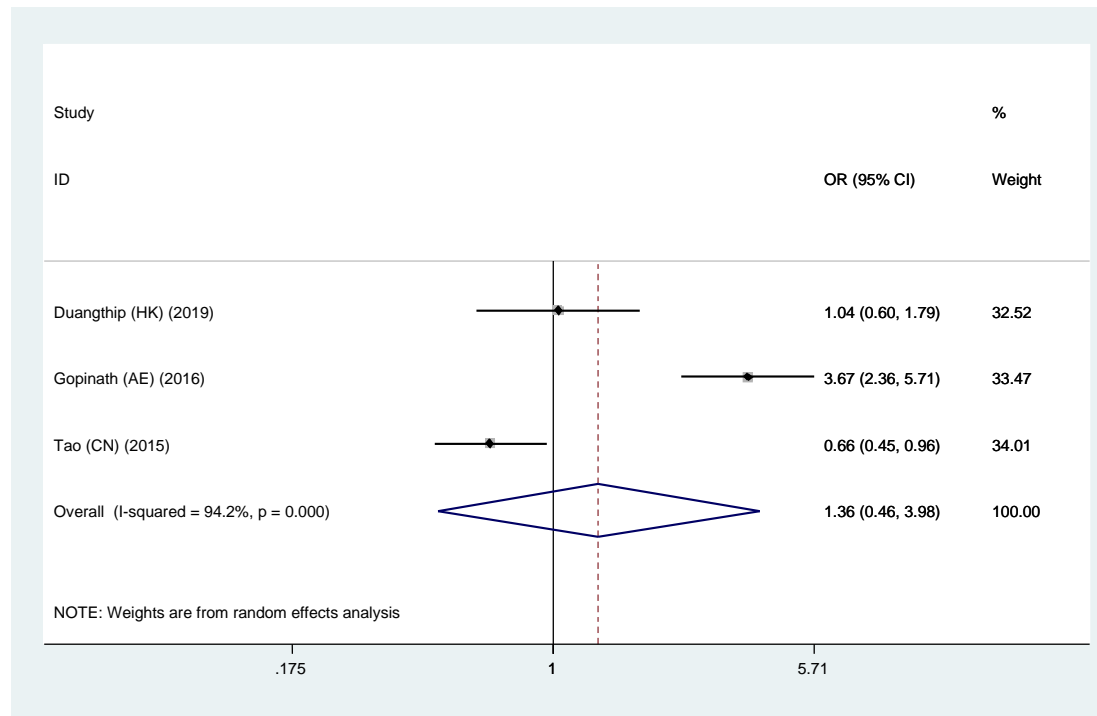

**95% CI:** 95% Confidence Interval; **I-squared:** I-squared statistics; **OR:** Odds Ratio; **p:** p-value

**Figure S3.** Forest plot showing likelihood of erosive tooth wear in locals vs foreigners.

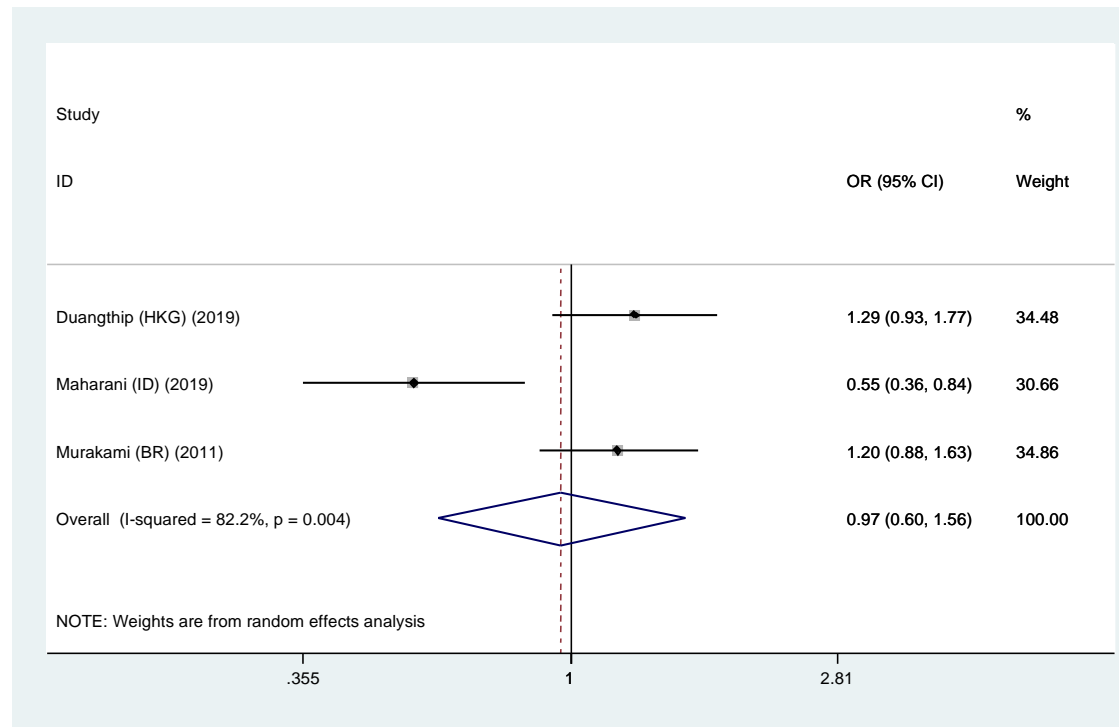

**95% CI:** 95% Confidence Interval; **I-squared:** I-squared statistics; **OR:** Odds Ratio; **p:** p-value

**Figure S4.** Forest plot showing likelihood of erosive tooth wear in children with caries vs without caries.

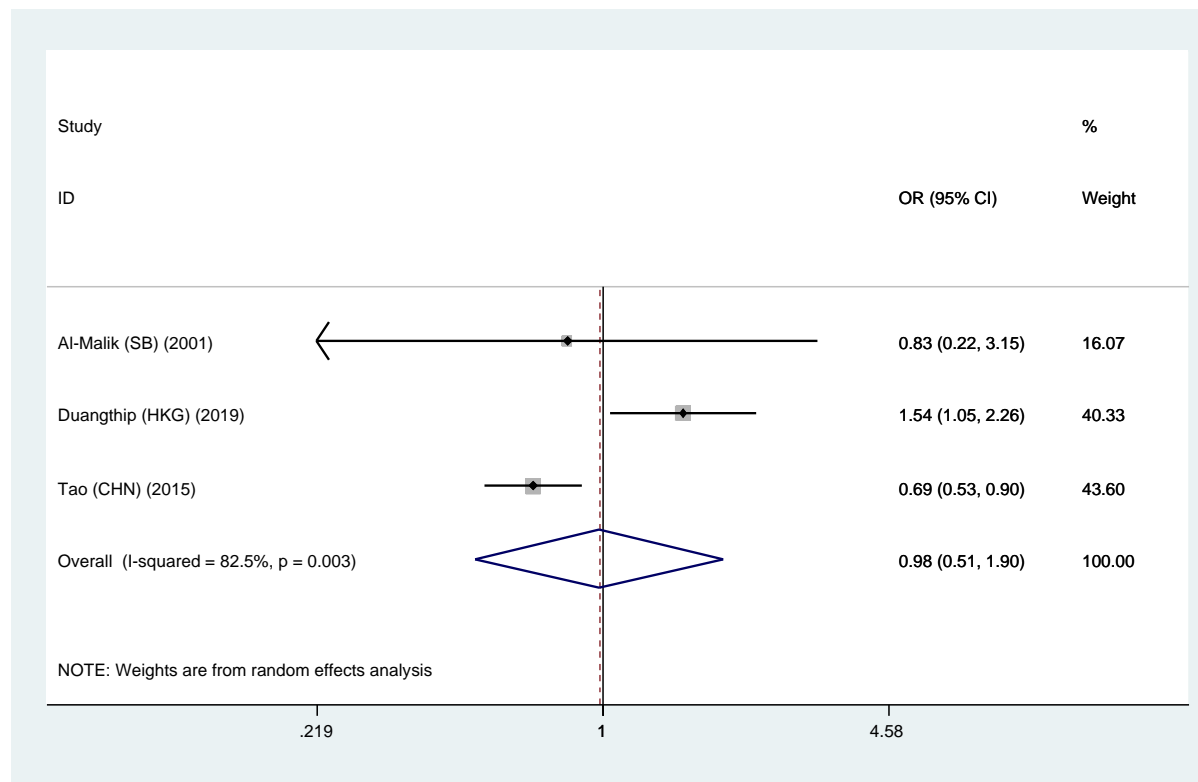

**95% CI:** 95% Confidence Interval; **I-squared:** I-squared statistics; **OR:** Odds Ratio; **p:** p-value

**Figure S5.** Forest plot showing likelihood of erosive tooth wear in children of parents with primary school level education and below compared to children of parents with education above primary level.

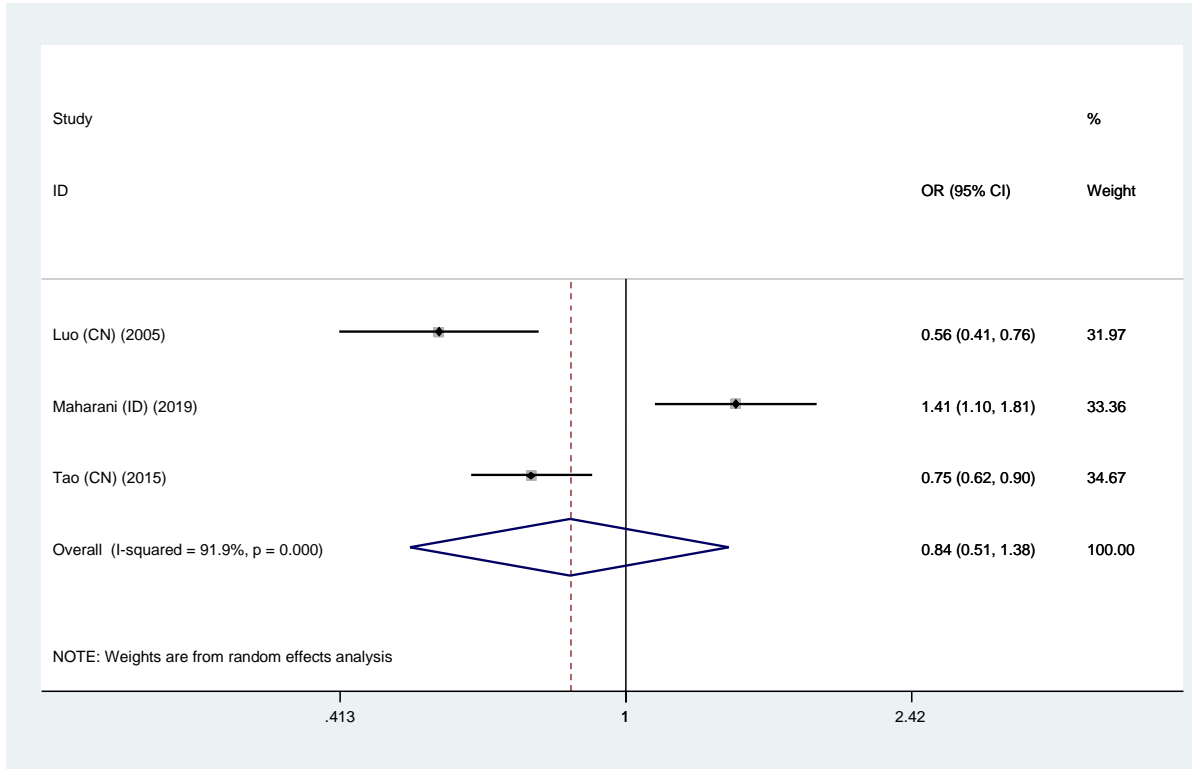

**95% CI:** 95% Confidence Interval; **I-squared:** I-squared statistics; **OR:** Odds Ratio; **p:** p-value

**Figure S6.** Forest plot showing likelihood of erosive tooth wear in children of parents with secondary school level education and below compared to children of parents with education above secondary level.

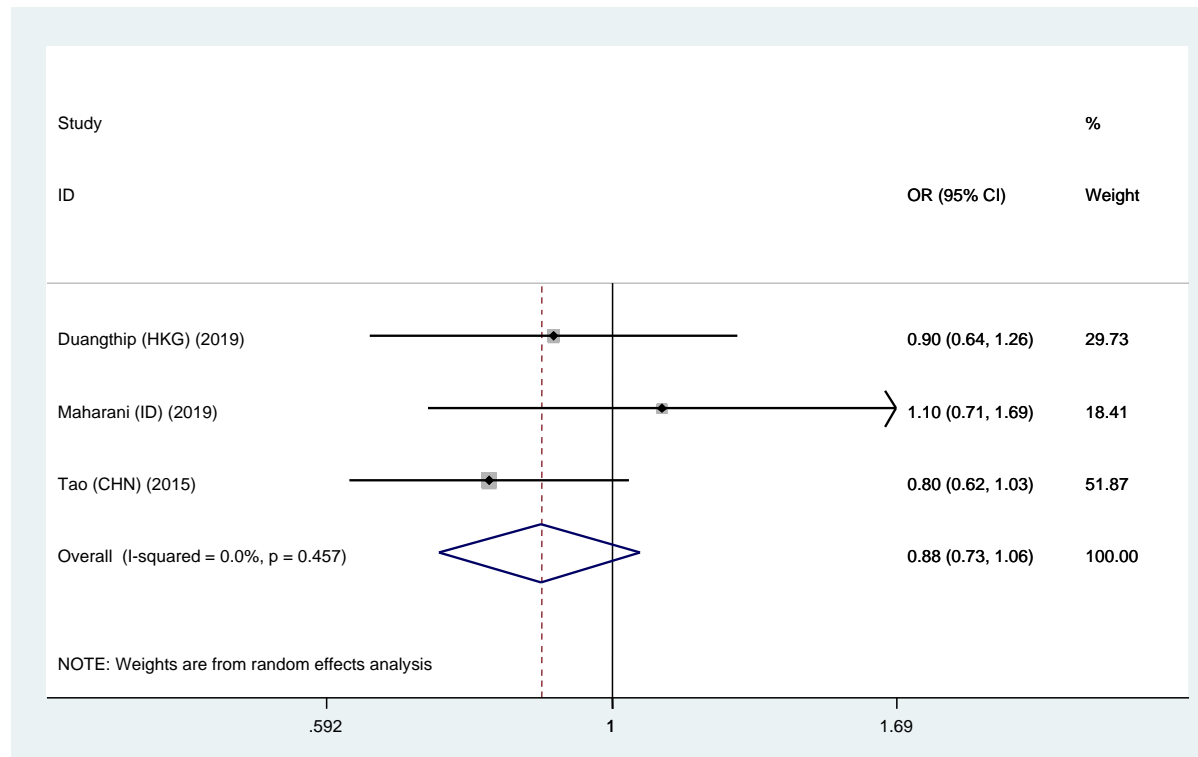

**95% CI:** 95% Confidence Interval; **I-squared:** I-squared statistics; **OR:** Odds Ratio; **p:** p-value

**Figure S7.** Forest plot showing likelihood of erosive tooth wear in children who brush their teeth once or less than once a day compared to children who brush their teeth more than once a day.
